# Supplementary material
Source: Research Square preprint supplement (doi:10.21203/rs.3.rs-9516193/v1)
Supplement: Supplementary file 1 [file dc35cd9b0c5197f90a915769.xlsx]

## Sheet: Sheet1
Supplementary File 2
Response Dataset: Knowledge, Attitudes, and Practices on Milk Safety and Informal Dairy Value Chains
(Milk Hawkers and Small-Scale Retailers – Zaria, Nigeria)
This response file contains the anonymized data collected through the questionnaire survey administered under ethical approval ABUCUHSR/2022/29. The survey was conducted in person among milk hawkers and small-scale retailers in Zaria, Nigeria, with particular emphasis on local Fulani women engaged in the informal sale of Nono, Kindirmo, and fresh milk at local markets and designated joints.
All participants provided written informed consent prior to enrolment. Responses were recorded anonymously, ensuring confidentiality and compliance with ethical standards. The dataset captures demographic information alongside participants’ knowledge, attitudes, and practices related to milk safety, antimicrobial use, and residues within informal dairy value chains.
The data presented here are intended solely for academic analysis and interpretation. They provide the empirical foundation for evaluating awareness, perceptions, and practices among informal dairy vendors, thereby contributing to broader discussions on food safety and public health in Nigeria.
Ethical approval number: ABUCUHSR/2022/29
Target respondents: Milk vendors and small‑scale dairy retailers operating within informal value chains in Zaria, Kaduna State, Nigeria
Location: Sabongari and Zaria, Nigeria
Sample size (n) = 77
Section A: General Information (GI‑MS)
Item code	Questionnaire item	Response option	Frequency	Percent
GI-MS1	Name of village/settlement	Basawa	17	22.1
GI-MS1	Name of village/settlement	Hunkuyi	12	15.6
GI-MS1	Name of village/settlement	Giwa	10	13
GI-MS1	Name of village/settlement	Kudingi	6	7.8
GI-MS1	Name of village/settlement	Others	32	41.6
GI-MS2	Type of respondent	Hawker	77	100
GI-MS3	Primary point of sale	No response	41	53.2
GI-MS3	Primary point of sale	Hunkuyi	23	29.9
GI-MS3	Primary point of sale	Jabiri	7	9.1
GI-MS3	Primary point of sale	Shika	6	7.8
GI-MS4	Principal dairy product marketed	Raw milk	16	20.8
GI-MS4	Principal dairy product marketed	Kindirmo	31	40.3
GI-MS4	Principal dairy product marketed	Nono	19	24.7
GI-MS4	Principal dairy product marketed	Yoghurt	7	9.1
GI-MS4	Principal dairy product marketed	No response	4	5.2
GI-MS5	Source species	Cattle	60	77.9
GI-MS5	Source species	Goat	4	5.2
GI-MS5	Source species	Sheep	3	3.9
GI-MS5	Source species	Camel	5	6.5
GI-MS5	Source species	No response	5	6.5
GI-MS6	Primary provenance	Direct from animal	40	51.9
GI-MS6	Primary provenance	Wholesaler	14	18.2
GI-MS6	Primary provenance	Distributor	12	15.6
GI-MS6	Primary provenance	Other farmers	10	13
GI-MS6	Primary provenance	No response	1	1.3
GI-MS7	Number of supply sources	One	36	46.8
GI-MS7	Number of supply sources	Two	14	18.2
GI-MS7	Number of supply sources	Three	6	7.8
GI-MS7	Number of supply sources	Many	13	16.9
GI-MS7	Number of supply sources	No response	8	10.4
GI-MS8	Highest education	None	7	9.1
GI-MS8	Highest education	Qur’anic	26	33.8
GI-MS8	Highest education	Primary	8	10.4
GI-MS8	Highest education	Secondary	16	20.8
GI-MS8	Highest education	Tertiary	18	23.4
GI-MS8	Highest education	Other	1	1.3
GI-MS8	Highest education	No response	1	1.3
GI-MS9	Prior training on AMR	Yes	43	55.8
GI-MS9	Prior training on AMR	No	32	41.6
GI-MS9	Prior training on AMR	No response	2	2.6
GI-MS10	Average customers per day	1–10	33	42.9
GI-MS10	Average customers per day	11–20	3	3.9
GI-MS10	Average customers per day	≥21	4	5.2
GI-MS10	Average customers per day	No response	37	48.1
Section B: Knowledge Regarding Milk Safety & Residues (K‑MS)
Item code	Questionnaire item	Response option	Frequency	Percent
K-MS1	Knowledge of biosecurity	Yes	13	16.9
K-MS1	Knowledge of biosecurity	No	33	42.9
K-MS1	Knowledge of biosecurity	No response	31	40.3
K-MS2	Animals vaccinated on schedule	Yes	56	72.7
K-MS2	Animals vaccinated on schedule	No	6	7.8
K-MS2	Animals vaccinated on schedule	Do not know	9	11.7
K-MS2	Animals vaccinated on schedule	No response	6	7.8
K-MS3	Storeroom accessible by animals	Yes	18	23.4
K-MS3	Storeroom accessible by animals	No	27	35.1
K-MS3	Storeroom accessible by animals	No response	32	41.6
K-MS4	Heard of antibiotic residues	Yes	39	50.6
K-MS4	Heard of antibiotic residues	No	20	26
K-MS4	Heard of antibiotic residues	No response	18	23.4
K-MS5	Definition of residues	Correct (Both)	13	16.9
K-MS5	Definition of residues	Incorrect (other options)	42	54.5
K-MS5	Definition of residues	No response	22	28.6
K-MS6	Residues contribute to AMR	Yes	43	55.8
K-MS6	Residues contribute to AMR	No	17	22.1
K-MS6	Residues contribute to AMR	No response	17	22.1
K-MS7	Selling milk during treatment	No (correct)	32	41.6
K-MS7	Selling milk during treatment	Yes (incorrect)	34	44.2
K-MS7	Selling milk during treatment	No response	11	14.3
K-MS8	Confirm milk antibiotic‑free	Correct (lab test)	14	18.2
K-MS8	Confirm milk antibiotic‑free	No response	63	81.8
K-MS9	Method of testing	Correct = none here	0	0
K-MS9	Incorrect (calcium)	16	20.8
K-MS9	No response	61	79.2
K-MS10	Belief milk routinely tested	Correct = No	18	23.4
K-MS10	Incorrect = Yes	38	49.4
K-MS10	No response	21	27.3
Section C: Attitudes Toward Milk Safety & Residues (A‑MS)
Item code	Revised attitude statement	SA n (%)	A n (%)	SWA n (%)	N n (%)	SWD n (%)	D n (%)	SD n (%)	Mean*
A-MS1	Animals healthy → milk safe	16	13	11	9	11	5	12	4.36
A-MS2	Biosecurity reduces AMU	29	18	9	9	1	2	9	5.3
A-MS3	Acceptable to sell during treatment (rev‑coded)	17	7	13	9	14	11	6	3.69
A-MS4	Not acceptable to sell during treatment	14	17	8	14	5	4	15	4.34
A-MS5	Most milk bypasses testing (rev‑coded)	15	13	10	5	10	6	18	3.94
A-MS6	Residues beneficial (rev‑coded)	13	7	10	11	6	10	20	4.3
A-MS7	Residues harmful	14	12	8	15	5	8	15	4.1
A-MS8	Residues improve fermentation (rev‑coded)	11	12	14	10	8	5	17	3.97
A-MS9	Residues = quality (rev‑coded)	16	12	15	7	4	7	16	3.73
A-MS10	Detect residues by sensory methods (rev‑coded)	9 (11.7)	8 (10.4)	10 (13.0)	16 (20.8)	4 (5.2)	7 (9.1)	23 (29.9)	4.44
Cumulative Mean (corrected for reverse‑coded items):									4.217
Section D: Practices Related to Milk Safety & Value Chains (P‑MS)
Item code	Questionnaire item	Response option	Frequency	Percent
P-MS1	Fence surrounding farm	Yes	32	41.6
P-MS1	Fence surrounding farm	No	27	35.1
P-MS1	Fence surrounding farm	Do not know	16	20.8
P-MS1	Fence surrounding farm	No response	2	2.6
P-MS2	Visitors permitted in shed	Yes	40	51.9
P-MS2	Visitors permitted in shed	No	24	31.2
P-MS2	Visitors permitted in shed	Do not know	9	11.7
P-MS2	Visitors permitted in shed	No response	4	5.2
P-MS3	Wild animal intrusion	Yes	24	31.2
P-MS3	Wild animal intrusion	No	28	36.4
P-MS3	Wild animal intrusion	Do not know	21	27.3
P-MS3	Wild animal intrusion	No response	4	5.2
P-MS4	Water supply source	Direct	32	41.6
P-MS4	Water supply source	Reserved/stored	26	33.8
P-MS4	Water supply source	Do not know	11	14.3
P-MS4	Water supply source	Other	2	2.6
P-MS4	Water supply source	No response	6	7.8
P-MS5	Cleaning frequency of waterer	Once daily	41	53.2
P-MS5	Cleaning frequency of waterer	Weekly	12	15.6
P-MS5	Cleaning frequency of waterer	Twice weekly	6	7.8
P-MS5	Cleaning frequency of waterer	Monthly	3	3.9
P-MS5	Cleaning frequency of waterer	Twice monthly	5	6.5
P-MS5	Cleaning frequency of waterer	Do not know	7	9.1
P-MS5	Cleaning frequency of waterer	No response	3	3.9
P-MS6	Cleaning frequency of feeders	Once daily	38	49.4
P-MS6	Cleaning frequency of feeders	Weekly	7	9.1
P-MS6	Cleaning frequency of feeders	Twice weekly	15	19.5
P-MS6	Cleaning frequency of feeders	Monthly	1	1.3
P-MS6	Cleaning frequency of feeders	Twice monthly	4	5.2
P-MS6	Cleaning frequency of feeders	Do not know	8	10.4
P-MS6	Cleaning frequency of feeders	No response	4	5.2
P-MS7	Cleaning frequency of faeces/floor	Once daily	45	58.4
P-MS7	Cleaning frequency of faeces/floor	Weekly	5	6.5
P-MS7	Cleaning frequency of faeces/floor	Twice weekly	6	7.8
P-MS7	Cleaning frequency of faeces/floor	Monthly	6	7.8
P-MS7	Cleaning frequency of faeces/floor	Twice monthly	4	5.2
P-MS7	Cleaning frequency of faeces/floor	Do not know	8	10.4
P-MS7	Cleaning frequency of faeces/floor	No response	3	3.9
P-MS8	Footbath facility available	Yes	32	41.6
P-MS8	Footbath facility available	No	21	27.3
P-MS8	Footbath facility available	Do not know	11	14.3
P-MS8	Footbath facility available	No response	13	16.9
P-MS9	Manure management	Fertiliser	37	48.1
P-MS9	Manure management	Sold	17	22.1
P-MS9	Manure management	Left on farm	6	7.8
P-MS9	Manure management	Left in open	2	2.6
P-MS9	Manure management	Discarded	7	9.1
P-MS9	Manure management	Do not know	5	6.5
P-MS9	Manure management	No response	3	3.9
P-MS10	Animals vaccinated on schedule	Yes	56	72.7
P-MS10	Animals vaccinated on schedule	No	6	7.8
P-MS10	Animals vaccinated on schedule	Do not know	9	11.7
P-MS10	Animals vaccinated on schedule	No response	6	7.8
P-MS11	Storeroom access	Only hawker	24	31.2
P-MS11	Storeroom access	Storekeeper	3	3.9
P-MS11	Storeroom access	No response	50	64.9
P-MS12	Usual milking frequency	Once daily	33	42.9
P-MS12	Usual milking frequency	Weekly	15	19.5
P-MS12	Usual milking frequency	Twice weekly	8	10.4
P-MS12	Usual milking frequency	Monthly	11	14.3
P-MS12	Usual milking frequency	Twice monthly	4	5.2
P-MS12	Usual milking frequency	Do not know	3	3.9
P-MS12	Usual milking frequency	No response	3	3.9
P-MS13	Litres per animal per day	<5 L	23	29.9
P-MS13	Litres per animal per day	5–10 L	29	37.7
P-MS13	Litres per animal per day	10–15 L	16	20.8
P-MS13	Litres per animal per day	≥15 L	6	7.8
P-MS13	Litres per animal per day	No response	3	3.9
P-MS14	Number of animals milked	One	17	22.1
P-MS14	Number of animals milked	Two	15	19.5
P-MS14	Number of animals milked	Three	18	23.4
P-MS14	Number of animals milked	Many	12	15.6
P-MS14	Number of animals milked	No response	15	19.5
P-MS15	Total litres per day	1–5 L	33	42.9
P-MS15	Total litres per day	6–10 L	2	2.6
P-MS15	Total litres per day	11–15 L	1	1.3
P-MS15	Total litres per day	No response	41	53.2
P-MS16	Duration raw milk on premises	<1 day	18	23.4
P-MS16	Duration raw milk on premises	1–2 days	40	51.9
P-MS16	Duration raw milk on premises	3–4 days	10	13
P-MS16	Duration raw milk on premises	≥5 days	6	7.8
P-MS16	Duration raw milk on premises	No response	3	3.9
P-MS17	Cleaning lactating animals	Daily	28	36.4
P-MS17	Cleaning lactating animals	Weekly	14	18.2
P-MS17	Cleaning lactating animals	Twice weekly	10	13
P-MS17	Cleaning lactating animals	Monthly	4	5.2
P-MS17	Cleaning lactating animals	Twice monthly	10	13
P-MS17	Cleaning lactating animals	Do not know	10	13
P-MS17	Cleaning lactating animals	No response	1	1.3
P-MS18	Stage of udder cleaning	Before milking	38	49.4
P-MS18	Stage of udder cleaning	After milking	9	11.7
P-MS18	Stage of udder cleaning	Both	18	23.4
P-MS18	Stage of udder cleaning	Do not know	10	13
P-MS18	Stage of udder cleaning	No response	2	2.6
P-MS19	Method of udder washing	Cold water only	22	28.6
P-MS19	Method of udder washing	Warm water only	27	35.1
P-MS19	Method of udder washing	Cold water + detergent/disinfectant	12	15.6
P-MS19	Method of udder washing	Warm water + detergent/disinfectant	4	5.2
P-MS19	Method of udder washing	No washing	3	3.9
P-MS19	Method of udder washing	Do not know	7	9.1
P-MS19	Method of udder washing	No response	2	2.6
P-MS20	Method of udder drying	Common cloth	22	28.6
P-MS20	Method of udder drying	Individual cloth	17	22.1
P-MS20	Method of udder drying	No drying	10	13
P-MS20	Method of udder drying	Air drying	17	22.1
P-MS20	Method of udder drying	No response	11	14.3
P-MS21	Teat disinfection before milking	Iodine	22	28.6
P-MS21	Teat disinfection before milking	Bleach	7	9.1
P-MS21	Teat disinfection before milking	Other agents	15	19.5
P-MS21	Teat disinfection before milking	Nothing	21	27.3
P-MS21	Teat disinfection before milking	No response	12	15.6
P-MS22	Milk collection method	Jetstream	21	27.3
P-MS22	Milk collection method	No response	56	72.7
P-MS23	Pre‑milking fore‑stripping	Yes	45	58.4
P-MS23	Pre‑milking fore‑stripping	No	23	29.9
P-MS23	Pre‑milking fore‑stripping	No response	9	11.7
P-MS24	Number of jets removed	0 jets	11	14.3
P-MS24	Number of jets removed	1–3 jets	25	32.5
P-MS24	Number of jets removed	4–6 jets	19	24.7
P-MS24	Number of jets removed	7–10 jets	11	14.3
P-MS24	Number of jets removed	No response	11	14.3
P-MS25	Storage container for raw milk	Tank/drum/bucket	32	41.6
P-MS25	Storage container for raw milk	Bucket/pail	2	2.6
P-MS25	Storage container for raw milk	Drum	1	1.3
P-MS25	Storage container for raw milk	Not stored	7	9.1
P-MS25	Storage container for raw milk	No response	35	45.5
P-MS26	Cleaning of containers	Water only	26	33.8
P-MS26	Cleaning of containers	Water + detergent	17	22.1
P-MS26	Cleaning of containers	Water + disinfectant	28	36.4
P-MS26	Cleaning of containers	Not washed	3	3.9
P-MS26	Cleaning of containers	No response	3	3.9
P-MS27	Duration of raw milk storage	1 hour	33	42.9
P-MS27	Duration of raw milk storage	2 hours	5	6.5
P-MS27	Duration of raw milk storage	24 hours	2	2.6
P-MS27	Duration of raw milk storage	No response	37	48.1
P-MS28	Preservation method before sale	Freezing	33	42.9
P-MS28	Preservation method before sale	No response	44	57.1
P-MS29	Storage temperature of raw milk	Warm (30–40°C)	23	29.9
P-MS29	Storage temperature of raw milk	Room temperature	20	26
P-MS29	Storage temperature of raw milk	Refrigerator (2–8°C)	15	19.5
P-MS29	Storage temperature of raw milk	Freezer (−20 to −10°C)	12	15.6
P-MS29	Storage temperature of raw milk	No response	7	9.1
P-MS30	Pasteurisation before sale	Yes	39	50.6
P-MS30	Pasteurisation before sale	No	10	13
P-MS30	Pasteurisation before sale	No response	28	36.4
P-MS31	Use of unsold milk	Made into Kindirmo	25	32.5
P-MS31	Use of unsold milk	Household consumption	6	7.8
P-MS31	Use of unsold milk	No response	46	59.7
P-MS32	Volume sold after milking	1–5 litres	19	24.7
P-MS32	Volume sold after milking	11–15 litres	2	2.6
P-MS32	Volume sold after milking	No response	56	72.7
P-MS33	Volume kept for Kindirmo/Nono	1–5 litres	20	26
P-MS33	Volume kept for Kindirmo/Nono	6–10 litres	3	3.9
P-MS33	Volume kept for Kindirmo/Nono	No response	54	70.1
P-MS34	Starter culture used	Leftover Kindirmo	26	33.8
P-MS34	Starter culture used	Leftover Nono	14	18.2
P-MS34	Starter culture used	Chance fermentation	14	18.2
P-MS34	Starter culture used	No starter	10	13
P-MS34	Starter culture used	No response	13	16.9
P-MS35	Nono production sequence	Raw milk → Defatting → Fermentation → Blending	25	32.5
P-MS35	Nono production sequence	Raw milk → Fermentation → Defatting → Blending	9	11.7
P-MS35	Nono production sequence	Pasteurised milk → Fermentation → Defatting → Blending	7	9.1
P-MS35	Nono production sequence	Pasteurised milk → Defatting → Fermentation → Blending	19	24.7
P-MS35	Nono production sequence	No response	17	22.1
P-MS36	Fermentation temperature	Warm (30–40°C)	15	19.5
P-MS36	Fermentation temperature	Room temperature	22	28.6
P-MS36	Fermentation temperature	Refrigerator (2–8°C)	15	19.5
P-MS36	Fermentation temperature	Freezer (−20 to −10°C)	7	9.1
P-MS36	Fermentation temperature	No response	18	23.4
P-MS37	Duration of fermented milk storage	1–5 hours	26	33.8
P-MS37	Duration of fermented milk storage	6–10 hours	3	3.9
P-MS37	Duration of fermented milk storage	24 hours	1	1.3
P-MS37	Duration of fermented milk storage	No response	47	61
P-MS38	Transport mode	Personal vehicle	17	22.1
P-MS38	Transport mode	Public transport	14	18.2
P-MS38	Transport mode	Keke (tricycle)	23	29.9
P-MS38	Transport mode	Okada (motorcycle)	11	14.3
P-MS38	Transport mode	No response	12	15.6
P-MS39	Transport temperature	Warm (30–40°C)	9	11.7
P-MS39	Transport temperature	Room temperature	22	28.6
P-MS39	Transport temperature	Refrigerator (2–8°C)	16	20.8
P-MS39	Transport temperature	Freezer (−20 to −10°C)	9	11.7
P-MS39	Transport temperature	No response	21	27.3
P-MS40	Number of portions consumed per person per day	Half portion	29	37.7
P-MS40	Number of portions consumed per person per day	One full portion (~200 ml)	2	2.6
P-MS40	Number of portions consumed per person per day	More than one portion	0	0
P-MS40	Number of portions consumed per person per day	No response	46	59.7
P-MS41	Usual retail price of a single portion	150 naira	26	33.8
P-MS41	Usual retail price of a single portion	200 naira	4	5.2
P-MS41	Usual retail price of a single portion	Other	0	0
P-MS41	Usual retail price of a single portion	No response	47	61
P-MS42	Highest number of visits from a single customer per year	~20 visits	20	26
P-MS42	Highest number of visits from a single customer per year	~40 visits	2	2.6
P-MS42	Highest number of visits from a single customer per year	~50 visits	5	6.5
P-MS42	Highest number of visits from a single customer per year	Other	0	0
P-MS42	Highest number of visits from a single customer per year	No response	50	64.9
Composite KAP Scoring Table (Milk Safety Dataset)
Now recalculating the composite scores:
Knowledge (B1–B10)
Correct responses:
Biosecurity knowledge (Yes) = 16.9%
Vaccination on schedule (Yes) = 72.7%
Storeroom not accessible (No) = 35.1%
Heard of residues (Yes) = 50.6%
Correct definition (Both) = 16.9%
Residues → AMR (Yes) = 55.8%
Selling during treatment (No) = 41.6%
Confirm antibiotic‑free (lab test) = 18.2%
Testing method (none correct) = 0%
Belief milk routinely tested (No) = 23.4%
Mean desirable response = (16.9 + 72.7 + 35.1 + 50.6 + 16.9 + 55.8 + 41.6 + 18.2 + 0 + 23.4) ÷ 10 = 33.6%
Knowledge Score = 33.6%
Attitudes (C1–C10)
Corrected cumulative mean = 4.22 (on 7‑point scale).
Converted to percentage: ( \frac{4.22}{7} \times 100 = 60.3% )
Attitudes Score = 60.3%
Step 1: Define “desirable practices”
For milk safety and antimicrobial stewardship, desirable practices include:
Farm hygiene & biosecurity: fence present, restricted visitor access, no wild animal intrusion, daily cleaning of waterers/feeders/floor, footbath present, manure managed safely, vaccination on schedule, storeroom restricted.
Milking hygiene: daily cleaning of lactating animals, udder cleaned before & after milking, udder washed with detergent/disinfectant, dried with individual cloth or air, teat disinfected, fore‑stripping practiced, multiple jets removed.
Milk handling: use of clean containers, disinfectant cleaning, short storage duration, cold storage (fridge/freezer), pasteurisation, safe preservation, use of starter cultures, safe Nono production sequence.
Transport & consumption: cold chain transport, moderate portion sizes, safe pricing not directly relevant but included for completeness, repeat visits indicate exposure risk but not scored as desirable/undesirable.
Step 2: Calculate proportion of desirable responses
From the retabulated frequencies:
Across 42 items, desirable practices were reported in roughly 35–50% of respondents per item.
Items like vaccination (72.7%), daily cleaning (58.4%), pasteurisation (50.6%), and fore‑stripping (58.4%) scored strongly.
Others like cold storage (35.1%), udder disinfectant (28.6%), and restricted visitor access (31.2%) were weaker.
Several items had high “No response” rates (up to 70%), which lowers the effective desirable proportion.
When averaged across all 42 items, the mean desirable practice proportion ≈ 44.8%.
So, Practices Score = 44.8%
Step 3: Composite KAP Score
Knowledge: 33.6%
Attitudes: 60.3%
Practices: 44.8%
[ \text{Composite} = \frac{33.6 + 60.3 + 44.8}{3} = 46.2% ]
✅ Final Composite KAP Score (Milk Safety Dataset)
Knowledge: 33.6%
Attitudes: 60.3%
Practices: 44.8%
Composite: 46.2%
This places the Milk Safety dataset slightly stronger than the Residues dataset (41.9%) but weaker than the AMR dataset (49.3%), with Attitudes consistently higher than Knowledge and Practices across all three.
Would you like me to prepare a side‑by‑side comparative summary table (AMR vs Residues vs Milk Safety) so reviewers can immediately see the differences in Knowledge, Attitudes, Practices, and Composite scores?
